# PIPKI $\gamma$ Regulates Focal Adhesion Dynamics and Colon Cancer Cell Invasion

Zhaofei Wu<sup>1</sup>, Xiang Li<sup>1</sup>, Manjula Sunkara<sup>2</sup>, Heather Spearman<sup>1</sup>, Andrew J. Morris<sup>2,3</sup>, Cai Huang<sup>1,4\*</sup>

**1** Markey Cancer Center, University of Kentucky, Lexington, Kentucky, United States of America, **2** Division of Cardiovascular Medicine, University of Kentucky, Lexington, Kentucky, United States of America, **3** Department of Internal Medicine, University of Kentucky, Lexington, Kentucky, United States of America, **4** Department of Molecular and Biomedical Pharmacology, University of Kentucky, Lexington, Kentucky, United States of America

## Abstract

Focal adhesion assembly and disassembly are essential for cell migration and cancer invasion, but the detailed molecular mechanisms regulating these processes remain to be elucidated. Phosphatidylinositol phosphate kinase type I $\gamma$  (PIPKI $\gamma$ ) binds talin and is required for focal adhesion formation in EGF-stimulated cells, but its role in regulating focal adhesion dynamics and cancer invasion is poorly understood. We show here that overexpression of PIPKI $\gamma$  promoted focal adhesion formation, whereas cells expressing either PIPKI $\gamma^{K188,200R}$  or PIPKI $\gamma^{D316K}$ , two kinase-dead mutants, had much fewer focal adhesions than those expressing WT PIPKI $\gamma$  in CHO-K1 cells and HCT116 colon cancer cells. Furthermore, overexpression of PIPKI $\gamma$ , but not PIPKI $\gamma^{K188,200R}$ , resulted in an increase in both focal adhesion assembly and disassembly rates. Depletion of PIPKI $\gamma$  by using shRNA strongly inhibited formation of focal adhesions in HCT116 cells. Overexpression of PIPKI $\gamma^{K188,200R}$  or depletion of PIPKI $\gamma$  reduced the strength of HCT116 cell adhesion to fibronectin and inhibited the invasive capacities of HCT116 cells. PIPKI $\gamma$  depletion reduced PIP<sub>2</sub> levels to ~40% of control and PIP<sub>3</sub> to undetectable levels, and inhibited vinculin localizing to focal adhesions. Taken together, PIPKI $\gamma$  positively regulates focal adhesion dynamics and cancer invasion, most probably through PIP<sub>2</sub>-mediated vinculin activation.

**Citation:** Wu Z, Li X, Sunkara M, Spearman H, Morris AJ, et al. (2011) PIPKI $\gamma$  Regulates Focal Adhesion Dynamics and Colon Cancer Cell Invasion. PLoS ONE 6(9): e24775. doi:10.1371/journal.pone.0024775

**Editor:** Maddy Parsons, Kings College London, United Kingdom

**Received:** July 11, 2011; **Accepted:** August 17, 2011; **Published:** September 12, 2011

**Copyright:** © 2011 Wu et al. This is an open-access article distributed under the terms of the Creative Commons Attribution License, which permits unrestricted use, distribution, and reproduction in any medium, provided the original author and source are credited.

**Funding:** The study was supported by Markey Cancer Center Start-up fund (University of Kentucky) (to Cai Huang) and partially by Migration Consortium grant (NIH GM64346) (to Ken Jacobson, University of North Carolina-Chapel Hill). The funders had no role in study design, data collection and analysis, decision to publish, or preparation of the manuscript.

**Competing Interests:** The authors have declared that no competing interests exist.

\* E-mail: cai-huang@uky.edu

 These authors contributed equally to this work.

## Introduction

Focal adhesions (FAs, also called cell-matrix adhesions) are specific types of large macromolecular assemblies at the ventral surface of cells, functioning as both mechanical machineries and regulatory signaling hubs [1,2]. Temporal and spatial regulation of focal adhesion assembly/disassembly is required for cell migration [3]. During cell migration, nascent focal adhesions (also called focal complexes) are formed to stabilize lamellipodia at the front of cells while focal adhesions are dissolved at the trailing edges of cells [4,5].

Focal adhesion assembly and disassembly are also implicated in cancer invasion, a prerequisite for metastasis. DRR (Down-Regulated in Renal cell carcinoma) associates with actin and microtubules and stimulates glioma invasion by promoting focal adhesion disassembly [6]. The actin cross-linking protein filamin A suppresses focal adhesion disassembly and breast cancer cell invasion [7]. Rho/Rock signaling promotes tumor cell migration and invasion by regulating focal adhesion dynamics through caveolin-1 phosphorylation [8]. FAK also promotes focal adhesion disassembly and cancer invasion [9,10,11]. Focal adhesion dynamics and signaling pathways that regulate this process could be therefore an attractive target for cancer therapy.

Many molecules have been shown to regulate focal adhesion dynamics. FAK regulates focal adhesion turnover [9,12], probably

through a dynamin and microtubule-dependent pathway [13]. Paxillin, a focal adhesion adaptor, also modulates focal adhesion dynamics by JNK and PAK-mediated phosphorylation [14,15]. Talin activates integrins and initiates focal adhesion formation [16,17,18], whereas cleavage of talin by calpain mediates focal adhesion disassembly [19]. Calpain also cleaves FAK and paxillin to modulate focal adhesion dynamics [20,21]. We have shown that Smurf1-mediated ubiquitination of the talin head domain, one of the two cleavage products, plays an important role in focal adhesion disassembly and cell migration [22]. ACF7, a microtubule and filamentous actin binding protein, regulates focal adhesion assembly/disassembly through its ATPase activity [23]. However, the molecular mechanisms that control focal adhesion assembly/disassembly are not fully understood.

Phosphatidylinositol phosphate kinase type I $\gamma$  (PIPKI $\gamma$ ) is an enzyme that catalyzes ATP-dependent phosphorylation of phosphatidylinositol 4-phosphate (PI(4)P) to generate PI(4,5)P<sub>2</sub>, which regulates a variety of biological processes, including focal adhesion formation [24]. PIPKI $\gamma$  has a well-conserved kinase catalytic domain at the central region [25]. Within the catalytic domain, there is a subdomain called the activation loop, which determines site of phosphorylation on the inositol ring of the substrate. PIPKI $\gamma$  strongly interacts with talin and competes for talin binding with the  $\beta$  integrin tail [26,27]. It is localized at adherens junctions in epithelial cells [28,29]. It has been reported that PIPKI $\gamma$  is

required for focal adhesion formation in migratory cells [30]. However, the precise roles of the lipid kinase activities of PIPKI $\gamma$  in focal adhesion dynamics are not defined.

In the present study, we investigated the requirement for the lipid kinase activity of PIPKI $\gamma$  in focal adhesion dynamics and colon cancer invasion. Our results identify an essential role of PIPKI $\gamma$  in focal adhesion assembly/disassembly and cancer invasion.

## Results

### PIPKI $\gamma$ promotes focal adhesion formation

To examine a possible role for PIPKI $\gamma$  in focal adhesion formation, CHO-K1 cells were transfected with EGFP-PIPKI $\gamma$  or EGFP vector, respectively. The cells were re-plated on fibronectin, fixed with paraformaldehyde, incubated with an anti-paxillin monoclonal antibody, and then stained with Dylight 549 conjugated goat anti-mouse IgG. Focal adhesions were lined up around the edges of the EGFP vector-transfected cells, with few focal adhesions in the centers of the cells, whereas PIPKI $\gamma$  expression dramatically stimulated focal adhesion formation in the centers of the cells (Fig. 1A). Over-expression of PIPKI $\gamma$  stimulates an increase in focal adhesion numbers (Fig. 1B) and the increase was mainly contributed by small focal adhesions ( $<3 \mu\text{m}^2$ ) (Fig. 1C). The stimulation of focal adhesion formation by PIPKI $\gamma$  relies on its interaction with talin, because PIPKI $\gamma^{\text{W647F}}$ , a mutant that is deficient in the interaction with talin, was not able to promote focal adhesion formation (Fig. 1A, B, & C).

### PIPKI $\gamma$ kinase activity is required for stimulation of focal adhesion formation

PI(4,5)P<sub>2</sub> binds talin and strengthens the interaction between talin and the  $\beta$  integrin tail, stimulating integrin clustering [31]. PI(4,5)P<sub>2</sub> also binds vinculin and unmask the actin and talin binding sites on vinculin, promoting focal adhesion formation [32]. Therefore, PIPKI $\gamma$ -stimulated PI(4,5)P<sub>2</sub> synthesis could be essential for promoting focal adhesion formation. To test this hypothesis, we mutated two lysine residues, K188 and K200, to arginine residues within the ATP-binding site of PIPKI $\gamma$ . The mutant PIPKI $\gamma^{\text{K188,200R}}$  and the WT were purified from CHO-K1 cells and the kinase activities were examined *in vitro* by using mass spectrometry to quantitate production of PI(4,5)P<sub>2</sub> from PI(4)P. As shown in Fig. 2A, mutation at K188 and K200 reduced kinase activity by 95%. EGFP-tagged mutant PIPKI $\gamma^{\text{K188,200R}}$  and WT PIPKI $\gamma$  were stably expressed in CHO-K1 cells, and their effects on focal adhesion formation were examined after paxillin staining. Cells that stably express WT PIPKI $\gamma$  formed focal adhesions around the edges and in the centers of cells, whereas cells that express PIPKI $\gamma^{\text{K188,200R}}$ , similar to parental cells, possessed small focal adhesions, most of which were around the edges of the cells, and had a defect in spreading (Fig. 2B). Quantitative analysis indicated that PIPKI $\gamma$  increased focal adhesions by more than 2 fold, whereas PIPKI $\gamma^{\text{K188,200R}}$  did not significantly promote focal adhesion formation (Fig. 2C&D). These results indicate that PIPKI $\gamma$  activity is essential for focal adhesion formation in CHO-K1 cells.

To further verify the requirement of PIPKI $\gamma$  activity for focal adhesion formation, we tested the capacity of another kinase dead mutant, PIPKI $\gamma^{\text{D316K}}$  [33], to promote focal adhesion formation as described above. As shown in Fig. S1, the average focal adhesion number (per cell) in cells expressing PIPKI $\gamma^{\text{D316K}}$  was approximately 45, which is approximately the same as that in cells expressing EGFP vector (Fig. 1). The focal adhesions in cells expressing PIPKI $\gamma^{\text{D316K}}$  accumulated at the edges of the cells,

with very few focal adhesions in the center of the cells. This result confirms the essential role of PIPKI $\gamma$  activity in focal adhesion formation.

### The activity of PIPKI $\gamma$ is essential for its promoting focal adhesion dynamics

To examine whether PIPKI $\gamma$  lipid kinase activity is required for focal adhesion dynamics, CHO-K1 cells that stably express EGFP-PIPKI $\gamma$  or -PIPKI $\gamma^{\text{K188,200R}}$  were transfected with mDsRed-paxillin and then plated on MatTek dishes (with a glass coverslip at the bottom) precoated with fibronectin (5  $\mu\text{g}/\text{ml}$ ) and grown for 3 hr. TIRF images of mDsRed-paxillin were taken using a Nikon TIRF microscope and the temperature was maintained at 37°C using an INU-TIZ-F1 microscope incubation system (Tokai Hit). Images were recorded at 1-min intervals for a 120 min period. Focal adhesion assembly and disassembly rate constants were calculated as described previously [22]. The FA assembly and disassembly rate constants in cells expressing PIPKI $\gamma^{\text{K188,200R}}$  were  $0.083 \pm 0.014$  and  $0.072 \pm 0.010 \text{ min}^{-1}$ , respectively, which are similar to those in normal CHO-K1 cells that we reported previously [22], whereas FA assembly and disassembly rate constants were  $0.190 \pm 0.019$  and  $0.136 \pm 0.014 \text{ min}^{-1}$ , respectively, in cells expressing WT PIPKI $\gamma$  (Fig. 3). This result indicates that the inositol lipid kinase activity of PIPKI $\gamma$  is required for its stimulation of focal adhesion assembly and disassembly.

### An essential role for PIPKI $\gamma$ in focal adhesion formation in colon cancer cells

Focal adhesions have been implicated in regulating cancer invasion, while the role of focal adhesions in colon cancer cells has not been well defined. To determine if the activity of PIPKI $\gamma$  influences focal adhesion formation in colon cancer cells, HCT116 cells that stably express EGFP-PIPKI $\gamma$  or -PIPKI $\gamma^{\text{K188,200R}}$  were plated on fibronectin and stained for paxillin. As shown in Fig. 4A, most of the focal adhesions were located to the peripheral region, and HCT116 cells expressing PIPKI $\gamma^{\text{K188,200R}}$  had much fewer focal adhesions than those expressing the WT enzyme. The average focal adhesion number in cells expressing WT PIPKI $\gamma$  was 22.5/cell, whereas that in cells expressing PIPKI $\gamma^{\text{K188,200R}}$  was 11.5/cell, both of which were fewer than those observed in CHO-K1 cells (Fig. 4B). In addition, PIPKI $\gamma^{\text{K188,200R}}$  had more effect on the smaller focal adhesions than the larger ones (Fig. 4C).

To test whether PIPKI $\gamma$  is essential for focal adhesion formation in HCT116 cells, HCT116 cells were infected with recombinant lentiviruses that express PIPKI $\gamma$  shRNA or shRNA control and were selected with puromycin. As shown in Fig. 5A, expression of PIPKI $\gamma$  shRNA resulted in dramatic reduction in the endogenous PIPKI $\gamma$  level of HCT116 cells. The cells were then plated on fibronectin and stained for paxillin. Surprisingly, PIPKI $\gamma$  knock-down almost abolished focal adhesion formation in HCT116 cells (Fig. 5B). PIPKI $\gamma$  depletion reduced focal adhesion number by about 74% (Fig. 5C). Different from PIPKI $\gamma^{\text{K188,200R}}$ , PIPKI $\gamma$  shRNA had more effect on the larger focal adhesions than the smaller ones (Fig. 5D). These results indicate an essential role of PIPKI $\gamma$  in focal adhesion formation in HCT116 colon cancer cells. This dramatic effect of PIPKI $\gamma$  knockdown did not occur in MDA-MB-231 human breast cancer cells, where PIPKI $\gamma$  knockdown only partially inhibited focal adhesion formation (data not shown).

### PIPKI $\gamma$ positively modulates adhesion strength of colon cancer cells to fibronectin

To examine whether the activity of PIPKI $\gamma$  regulates cell adhesion strength on fibronectin, HCT116 cells that stably express

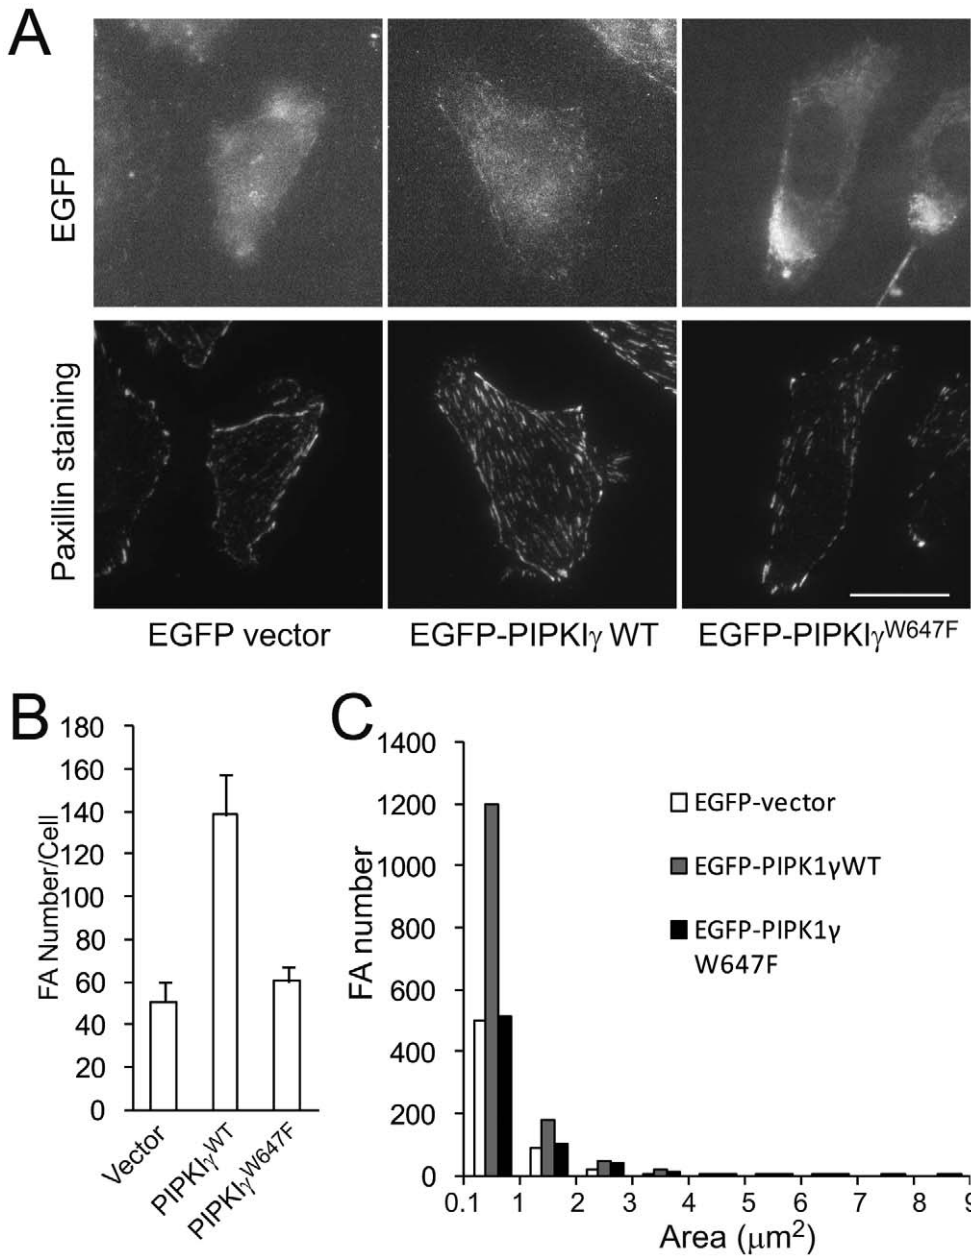

**Figure 1. PIP1 $\gamma$  promoted focal adhesion formation in CHO-K1 cells.** (A) TIRF images of CHO-K1 cells expressing EGFP, EGFP-PIP1 $\gamma$  WT or EGFP-PIP1 $\gamma$  W647F. Cells were transiently transfected with pEGFP-vector, -PIP1 $\gamma$  WT or -PIP1 $\gamma$  W647F, and then stained for paxillin. Scale bar, 20  $\mu$ m. (B) Expression of PIP1 $\gamma$  but not PIP1 $\gamma$  W647F caused an increase in focal adhesion number (n = 15, error bar = mean  $\pm$  s.e.m; Vector vs WT, P < 0.001; WT vs W647F, P < 0.001; Vector vs W647F, P > 0.05). (C) Area distribution of focal adhesions in cells expressing EGFP, EGFP-PIP1 $\gamma$  WT or EGFP-PIP1 $\gamma$  W647F. doi:10.1371/journal.pone.0024775.g001

EGFP-PIP1 $\gamma$  or -PIP1 $\gamma$ <sup>K188,200R</sup> were stained with calcein-AM and seeded on a 96-well plate that was pre-coated with different concentrations of fibronectin. The calcein fluorescence was read, and then the plate was inverted and centrifuged at 150 $\times$ g for 5 min. The calcein fluorescence was read again. As shown in Fig. 6A, the cell adhesion strength difference between the cells expressing PIP1 $\gamma$ <sup>K188,200R</sup> and the WT was not significant at high concentrations of fibronectin. However, at low concentrations of fibronectin, the cells expressing PIP1 $\gamma$ <sup>K188,200R</sup> had significantly lower adhesion strength as compared to those expressing the WT. PIP1 $\gamma$  knockdown also caused a significant decrease in cell adhesion strength in HCT116 cells (Fig. 6B).

These results indicate that PIP1 $\gamma$  activity regulates cell adhesion strength in colon cancer cells.

### PIP1 $\gamma$ is essential for invasion but not the migration of colon cancer cells

It has been reported that PIP1 $\gamma$  plays a role in cell migration. To test whether PIP1 $\gamma$  regulates the migration of HCT116 colon cancer cells, we employed time-lapsed wound-healing assays to examine the migration of HCT116 cells expressing EGFP-PIP1 $\gamma$  and -PIP1 $\gamma$ <sup>K188,200R</sup>, respectively, in the presence of HGF. As shown in Fig. S2 A&B, cells expressing PIP1 $\gamma$ <sup>K188,200R</sup> migrated slightly faster than those expressing the WT enzyme as measured

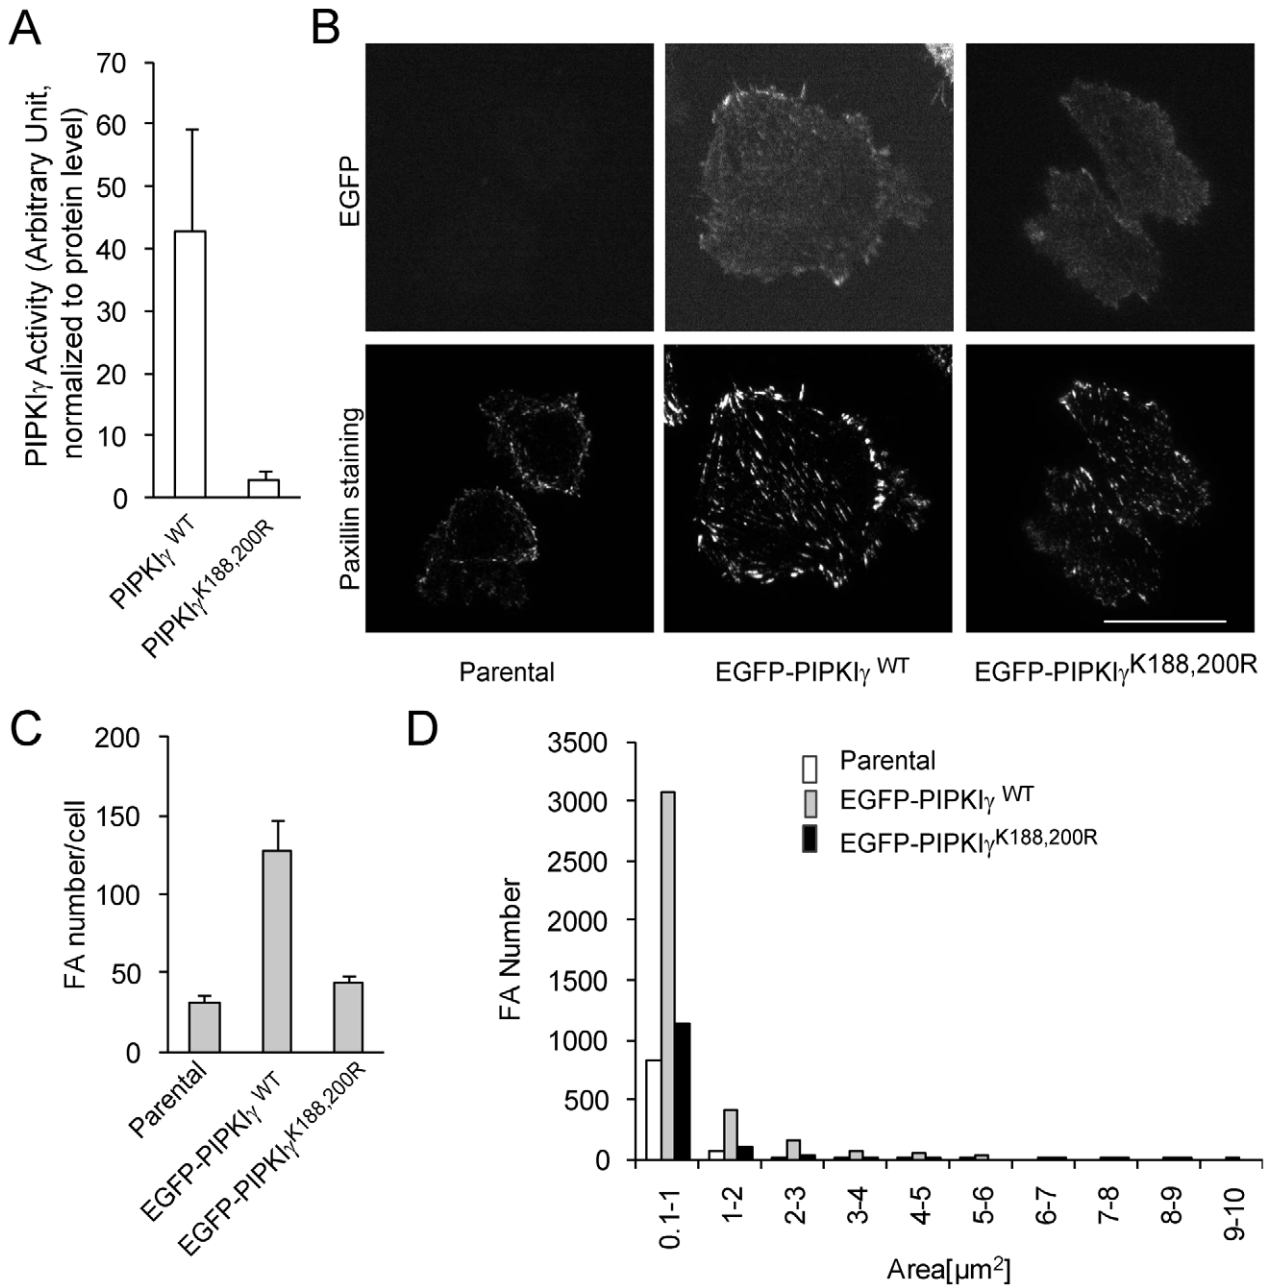

**Figure 2. Mutation at the kinase domain of PIPKI $\gamma$  abolished its activity and ability to promote focal adhesion formation in CHO-K1 cells.** (A) Analysis of the activities of PIPKI $\gamma$  and PIPKI $\gamma$ <sup>K188,200R</sup>. (B) TIRF images of CHO-K1 cells that express PIPKI $\gamma$  or PIPKI $\gamma$ <sup>K188,200R</sup> and the parental CHO-K1 cells. The parental cells and cells expressing EGFP-PIPKI $\gamma$  WT or -PIPKI $\gamma$ <sup>K188,200R</sup> were stained for paxillin. Scale bar, 20  $\mu\text{m}$ . (C) Quantitative analysis of focal adhesion numbers (per cell) in the parental cells and cells that express PIPKI $\gamma$  or PIPKI $\gamma$ <sup>K188,200R</sup> (n=30, error bar=mean  $\pm$  s.e.m; parental vs PIPKI $\gamma$ , P<0.001; parental vs PIPKI $\gamma$ <sup>K188,200R</sup>, P>0.05). (D) Area distribution of focal adhesions in the parental cells and cells expressing PIPKI $\gamma$  and PIPKI $\gamma$ <sup>K188,200R</sup>. doi:10.1371/journal.pone.0024775.g002

by time-lapse wound-healing assays. Also, depletion of PIPKI $\gamma$  had no significant effect on the migration of HCT116 cells in transwell assays (Fig. S2 C&D). These results suggest that PIPKI $\gamma$  activity is not essential for the migration of HCT116 colon cancer cells.

To test the role of PIPKI $\gamma$  in cancer invasion, the invasion of HCT116 cells that stably express PIPKI $\gamma$  shRNA or a shRNA control in the absence and presence of HGF was examined by

using Matrigel invasion assays. As shown in Fig. 7 (A&B), PIPKI $\gamma$  knockdown resulted in significant reduction in the invasion of HCT116 cells either in the absence or in the presence of HGF. The basal and HGF-stimulated invasive capacities of HCT116 cells stably expressing PIPKI $\gamma$ <sup>K188,200R</sup> are also significantly lower than those of the cells expressing the WT enzyme (Fig. 7C&D). These results indicate that PIPKI $\gamma$  positively regulates the invasion of HCT116 colon cancer cells.

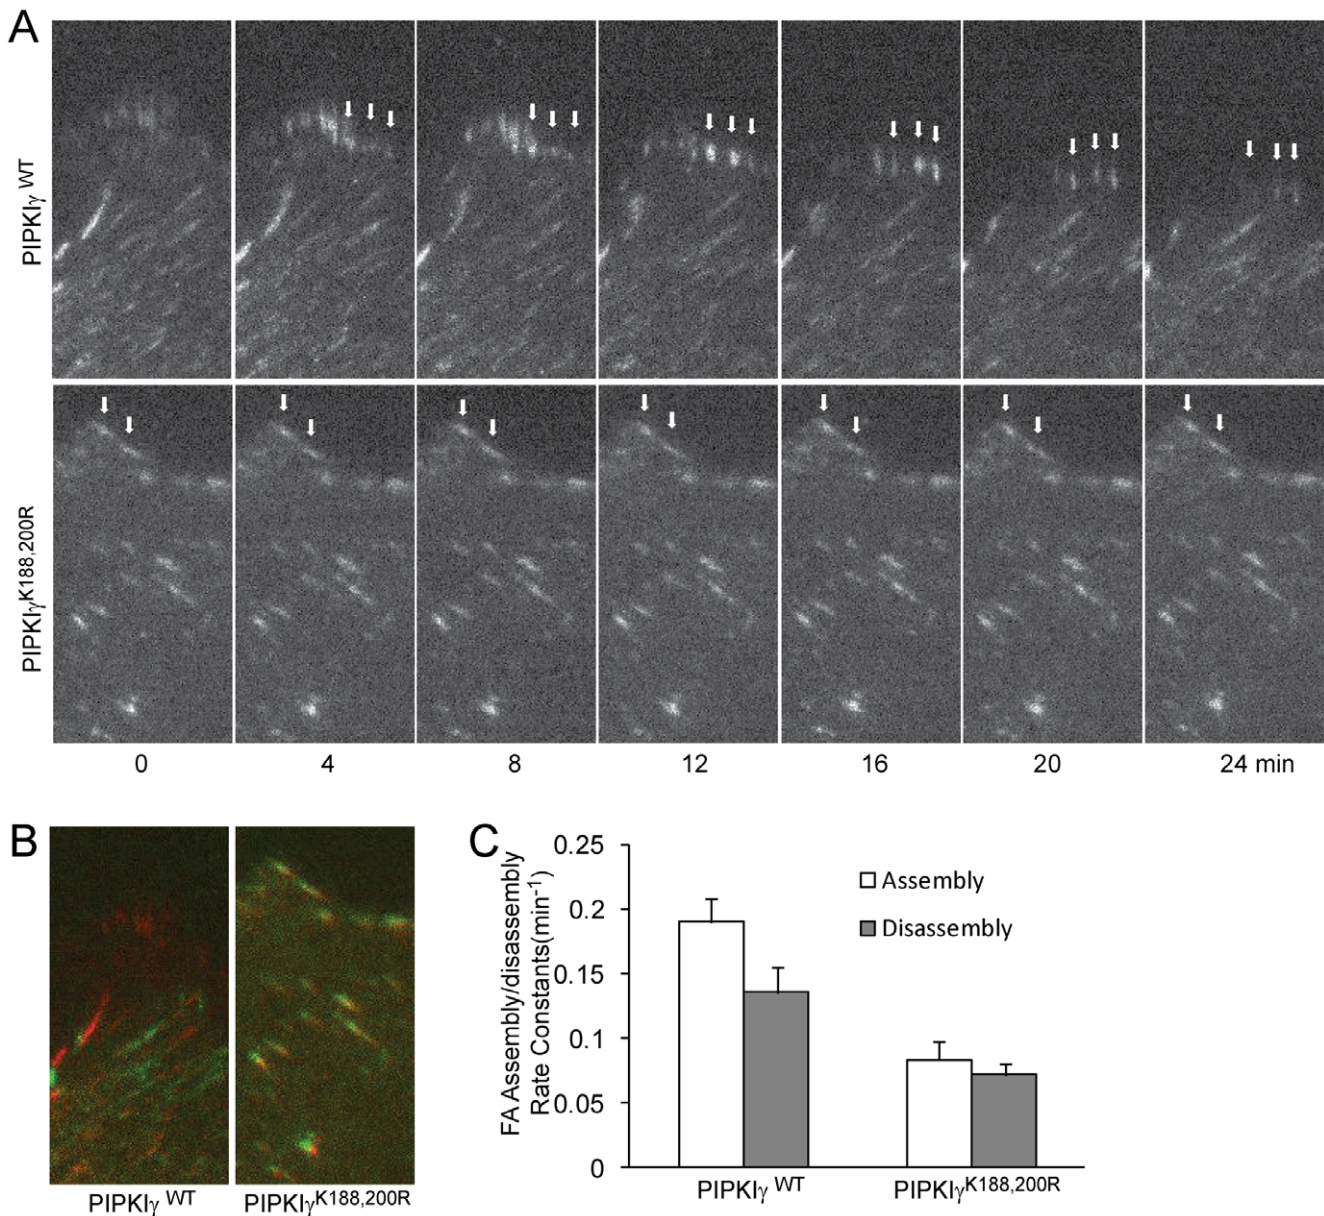

**Figure 3. PIPki $\gamma$  WT but not PIPki $\gamma$ K188,200R promoted focal adhesion assembly and disassembly in CHO-K1 cells.** (A) CHO-K1 cells stably expressing PIPki $\gamma$  or PIPki $\gamma$ K188,200R were transiently transfected with mDsRed-paxillin. The cells were plated on fibronectin and the dynamics of paxillin was analysed using time-lapse TIRF microscopy. Arrowheads point to dynamic (upper panels) and stable (lower panels) focal adhesions. (B) The overlay of 0 and 24 min in "A". (C) Quantification of the focal adhesion assembly and disassembly rate constants in cells that express PIPki $\gamma$  or PIPki $\gamma$ K188,200R. Quantifications are expressed as mean  $\pm$  s.e.m. of 50 focal adhesions from 10 cells. Assembly, WT vs K188,200R,  $P < 0.00005$ ; disassembly,  $p < 0.005$ . doi:10.1371/journal.pone.0024775.g003

### PIPki $\gamma$ regulates focal adhesion formation through activating vinculin by PI(4,5)P<sub>2</sub>

To dissect the mechanism by which PIPki $\gamma$  regulates focal adhesion formation, we set out to analyze the levels of polyphosphoinositides in HCT116 cells that express PIPki $\gamma$  shRNA or a shRNA control by using mass spectrometry. Depletion of PIPki $\gamma$  in HCT116 cells had no significant effect on the level of PIP, but caused significant reduction in PIP<sub>2</sub> level (note that these methods cannot distinguish positional enantiomers of these lipids so it is possible that PI(3,4)P<sub>2</sub> may contribute significantly to residual levels of PIP<sub>2</sub> in these cells). Interestingly, in support of this idea knockdown of PIPki $\gamma$  reduced PIP<sub>3</sub> levels below the detection

limit of our assay (Fig. 8). These results indicate that PIPki $\gamma$  is a key enzyme responsible for the production of PI(4,5)P<sub>2</sub> and PI(3,4,5)P<sub>3</sub> in HCT116 cells.

To see whether PI(3,4,5)P<sub>3</sub> is essential for focal adhesion formation in colon cancer cells, HCT116 cells were treated with LY294002, a specific inhibitor of phosphatidylinositol 3-kinase, and focal adhesion formation in these cells was examined after paxillin staining. LY294002 (20  $\mu$ M) had no significant effect on focal adhesion formation (data not shown). Taken together with the above observations, this finding indicates that PI(4,5)P<sub>2</sub>, but not PI(3,4,5)P<sub>3</sub>, is required for focal adhesion formation.

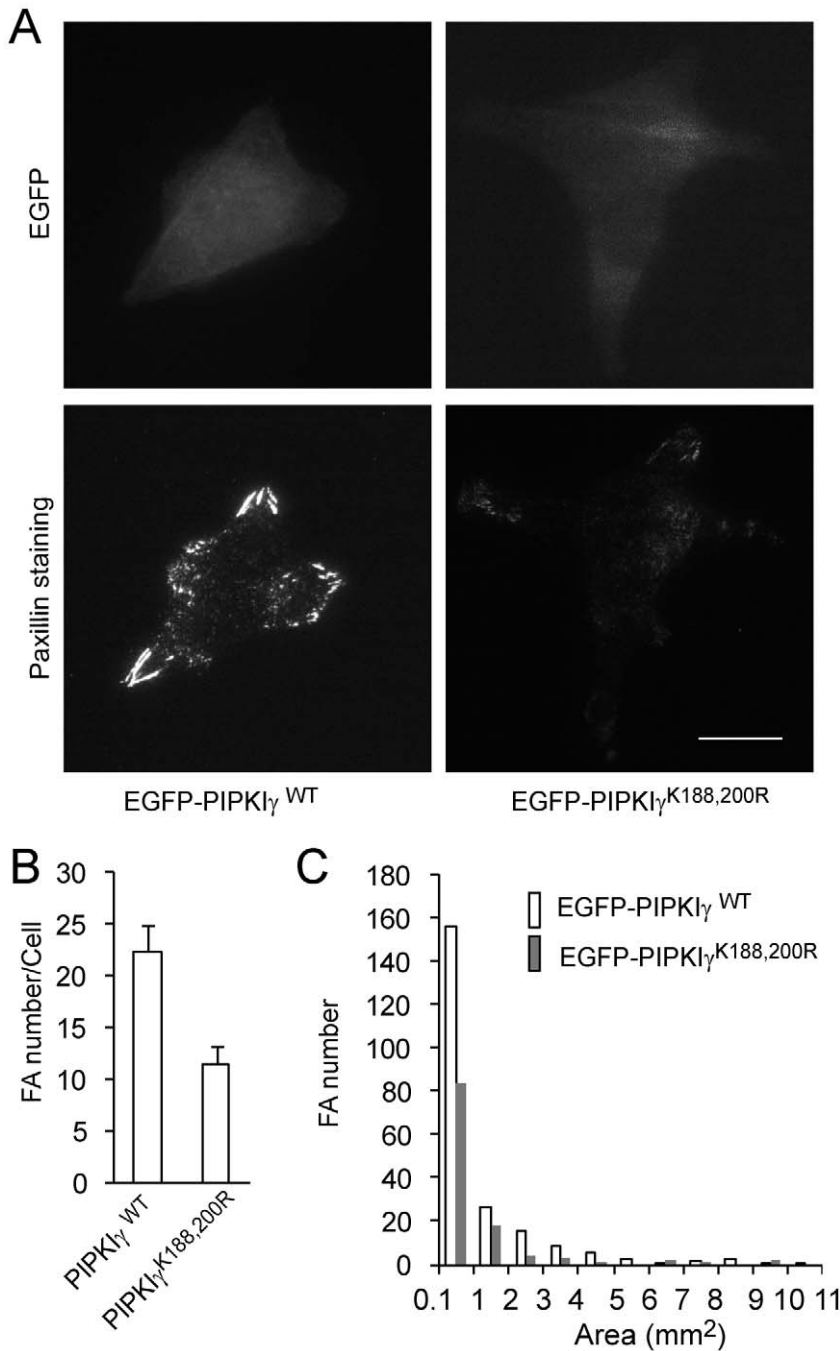

**Figure 4. PIPKI $\gamma$ <sup>K188,200R</sup> was incapable of mediating focal adhesion formation in HCT116 cells.** (A) TIRF images of CHO-K1 cells expressing PIPKI $\gamma$  or PIPKI $\gamma$ <sup>K188,200R</sup>. Cells that stably express EGFP-PIPKI $\gamma$  WT or -PIPKI $\gamma$ <sup>K188,200R</sup> were stained for paxillin. Scale bar, 20  $\mu$ m. (B) PIPKI $\gamma$ <sup>K188,200R</sup> failed to stimulate an increase in focal adhesion number (n = 10, error bar = mean  $\pm$  s.e.m; paired t-test, P < 0.005). (C) Area distribution of focal adhesions in cells expressing PIPKI $\gamma$  and PIPKI $\gamma$ <sup>K188,200R</sup>. doi:10.1371/journal.pone.0024775.g004

PI(4,5)P<sub>2</sub> binds and activates vinculin and is implicated in regulating focal adhesion formation [32]. If PIPKI $\gamma$ -mediated production of PI(4,5)P<sub>2</sub> is essential for focal adhesion formation in HCT116 cells, depletion of PIPKI $\gamma$  would reduce PI(4,5)P<sub>2</sub> levels and prevent vinculin from localizing to focal adhesions. To test this hypothesis, endogenous PIPKI $\gamma$ -depleted cells were infected with retroviruses expressing a codon-modified PIPKI $\gamma$  (rescue) (Fig. 9A), and the cells were stained for vinculin. Vinculin was rarely

localized to focal adhesions in PIPKI $\gamma$ -depleted HCT116 cells, whereas re-expression of PIPKI $\gamma$  in PIPKI $\gamma$ -depleted cells resulted in a dramatic increase in focal adhesion-localized vinculin (Fig. 9B). Quantitative analysis indicated that PIPKI $\gamma$  rescue restored focal adhesion formation in PIPKI $\gamma$ -depleted cells (Fig. 9C&D), as compared to the data in Fig. 5. These data suggest that PIPKI $\gamma$  may regulate focal adhesion formation through PI(4,5)P<sub>2</sub>-mediated vinculin activation.

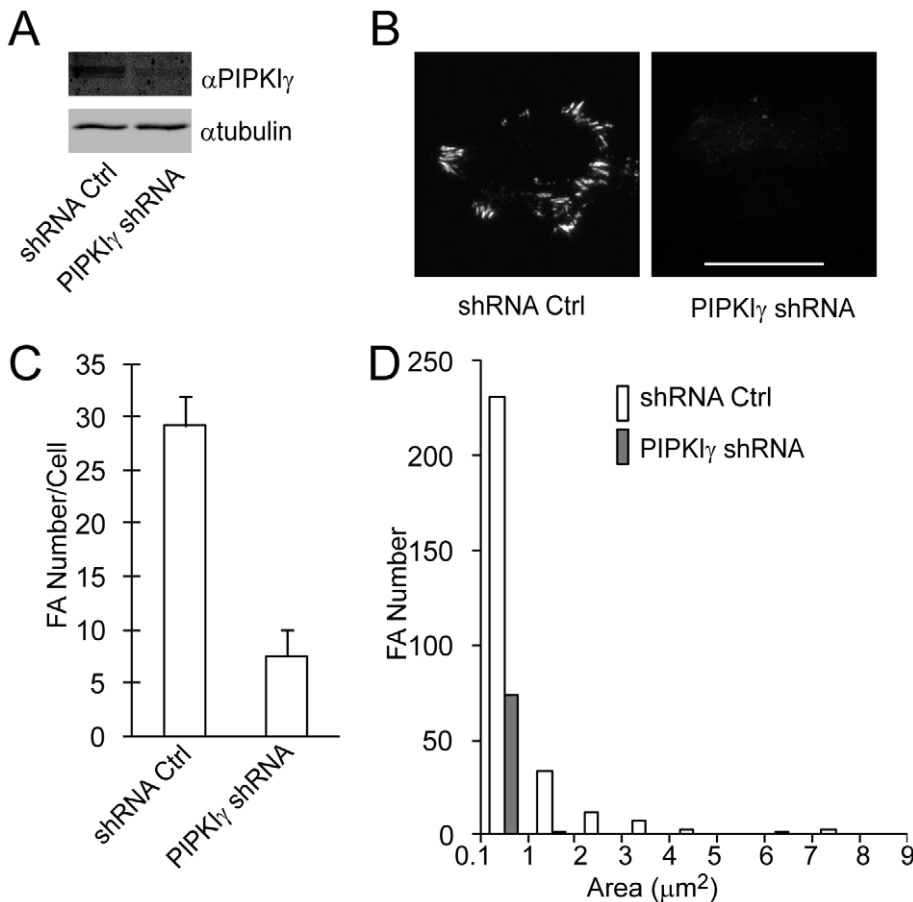

**Figure 5. PIPKI $\gamma$  is essential for focal adhesion formation in HCT116 cells.** (A) Expression of PIPKI $\gamma$  in cells stably expressing shRNA control and PIPKI $\gamma$  shRNA. (B) TIRF images of HCT116 cells that stably express control and PIPKI $\gamma$  shRNA. Cells were infected with lentiviral particles carrying control or PIPKI $\gamma$  shRNA, selected with puromycin, and stained for paxillin. Scale bar, 20  $\mu\text{m}$ . (C) PIPKI $\gamma$  depletion inhibited focal adhesion formation in HCT116 cells. (n = 10, error bar = mean  $\pm$  s.e.m; paired t-test,  $P < 0.0001$ ) (D) Area distribution of focal adhesions in cells expressing control and PIPKI $\gamma$  shRNA.

doi:10.1371/journal.pone.0024775.g005

## Discussion

Besides serving as the precursor of other second messengers, PI(4,5)P<sub>2</sub> itself binds many cytoskeletal and focal adhesion proteins and is believed to be a key regulator of focal adhesion dynamics [34]. PI(4,5)P<sub>2</sub> binds vinculin to unmask the talin-binding sites on vinculin [32]; it also binds talin thus stabilizing talin-integrin interactions [35]. PIPKI $\gamma$  is thought to be the enzyme that generates PI(4,5)P<sub>2</sub> spatially and temporally for focal adhesion formation during cell migration [27,34]. On the other hand, PI(4,5)P<sub>2</sub> has not been detected at focal adhesions and the role of PIPKI $\gamma$  in regulating focal adhesion dynamics is controversial [36]. PIPKI $\gamma$  has been shown to be required for focal adhesion formation during EGF-stimulated cell migration [30], whereas it has also been reported that expression of PIPKI $\gamma$  caused cell rounding and focal adhesion disassembly [26].

We show here that expression of PIPKI $\gamma$  at low levels in CHO-K1 cells stimulated focal adhesion formation (Fig. 1), whereas kinase-dead mutants, PIPKI $\gamma$ <sup>K188,200R</sup> and PIPKI $\gamma$ <sup>D316K</sup> failed to promote focal adhesion formation (Fig. 2, Fig. 4 and Fig. S1). Furthermore, PIPKI $\gamma$  knockdown almost completely abolished focal adhesion formation in HCT116 colon cancer cells (Fig. 5). In addition, expression of PIPKI $\gamma$  promoted focal adhesion assembly and also disassembly rates, while PIPKI $\gamma$ <sup>K188,200R</sup> was unable to do so (Fig. 3). These results identify an essential role of PIPKI $\gamma$  in regulating focal adhesion dynamics.

Although direct evidence is lacking, PI(4,5)P<sub>2</sub> has been well implicated in regulating integrin activation. PI(4,5)P<sub>2</sub> binds talin and blocks its self-inhibition (head-tail interaction) thus promoting its interaction with the  $\beta$  integrin tail [35]. It also stimulates integrin clustering [31]. The increase in both talin-integrin interaction and integrin clustering should stimulate integrin activation. We found that HCT116 cells expressing PIPKI $\gamma$ <sup>K188,200R</sup> have significantly lower adhesion strength as compared to those expressing the WT, and depletion of PIPKI $\gamma$  by shRNA also caused a significant decrease in cell adhesion strength in HCT116 cells (Fig. 6), suggesting that PIPKI $\gamma$  may modulate integrin activation in colon cancer cells.

It has been reported that PIPKI $\gamma$  is required for EGF-stimulated migration of MDA-MB-231 human breast cancer cells and HeLa human ovarian cancer cells [30,37]. However, our results here show that neither expressing PIPKI $\gamma$ <sup>K188,200R</sup>, a kinase-dead mutant, nor depletion of PIPKI $\gamma$  inhibit the migration of HCT116 cells (Fig. S2). The MDA-MB-231 and HeLa cells migrate much faster than HCT116 cells, suggesting that PIPKI $\gamma$  is essential for fast-moving cells, but not for slow-migrating cells like HCT116 cells. This is supported by our unpublished result that PIPKI $\gamma$ <sup>K188,200R</sup> dramatically inhibits the migration of Clone A cells, a fast-moving colon cancer cell line.

On the other hand, PIPKI $\gamma$  seems to be required for the invasion of both fast- (such as MDA-MB-231) and slow-invading

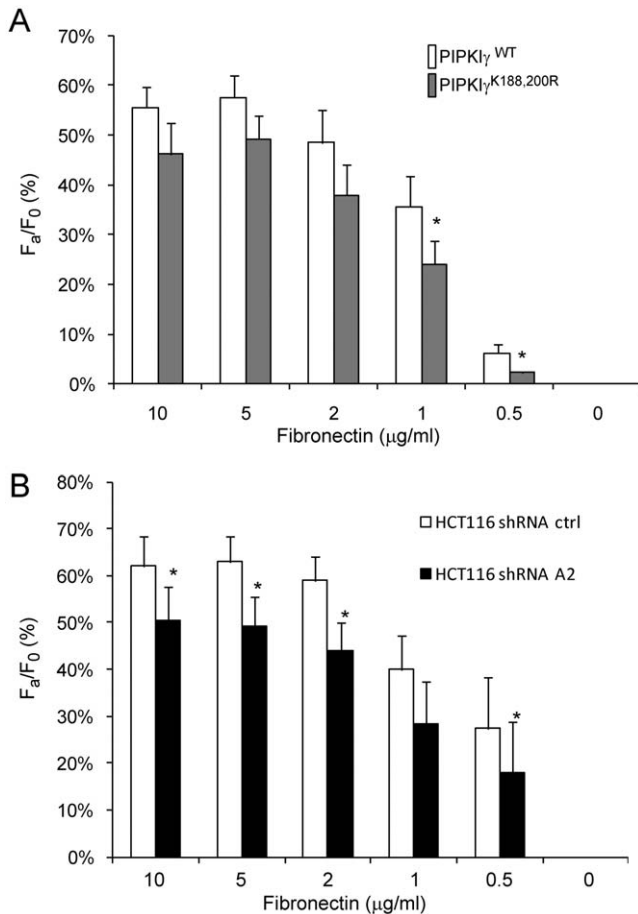

**Figure 6. Either expression of PIPKI $\gamma$ <sup>K188,200R</sup> or depletion of PIPKI $\gamma$  impaired the adhesion strength of HCT116 cells on fibronectin.** (A) Expression of PIPKI $\gamma$ <sup>K188,200R</sup> inhibited HCT116 cells adhering to low concentrations of fibronectin. The cells stably expressing PIPKI $\gamma$  or PIPKI $\gamma$ <sup>K188,200R</sup> were incubated with Calcein-AM and plated on a 96-well plate coated with fibronectin for centrifugation assays. (B) Depletion of PIPKI $\gamma$  inhibited HCT116 cells adhering to fibronectin. The cells that stably express control and PIPKI $\gamma$  shRNA were incubated with Calcein-AM and plated on a 96-well plate coated with fibronectin for centrifugation assays.  $F_a/F_0$  = (fluorescence after centrifugation) ÷ (fluorescence before centrifugation). doi:10.1371/journal.pone.0024775.g006

(such as HCT116) cancer cells. Depletion of PIPKI $\gamma$  has been shown to inhibit EGF-stimulated invasion of MDA-MB-231 cells [37], and either expressing PIPKI $\gamma$ <sup>K188,200R</sup> or the depletion of PIPKI $\gamma$  inhibits the invasion of HCT116 cells (Fig. 7). These results indicate an essential role of PIPKI $\gamma$  in controlling cancer invasion.

Previous studies have focused on the role of focal adhesion disassembly in regulating cancer invasion. DRR promotes glioma invasion by promoting focal adhesion disassembly [6]. Filamin A suppresses breast cancer cell invasion by inhibiting focal adhesion disassembly [7]. FAK also promotes focal adhesion disassembly and cancer invasion [9]. However, our results show that both expression of PIPKI $\gamma$ <sup>K188,200R</sup>, the kinase-dead mutant, and depletion of PIPKI $\gamma$  impair focal adhesion formation, accompanying the inhibition of the invasion of HCT116 (Fig. 4, 5 and 7). In addition, PIPKI $\gamma$  stimulates both focal adhesion assembly and disassembly (Fig. 3), suggesting that focal adhesion turnover, which requires focal adhesion assembly and disassembly spatially and temporarily, regulates the invasion of cancer cells.

PIPKI $\gamma$  is a major enzyme that controls polyphosphoinositide metabolism in HCT116 cells. PIPKI $\gamma$  knockdown results in significant reduction in the level of PI(4,5)P<sub>2</sub> and decreases PI(3,4,5)P<sub>3</sub> levels even more substantially (Fig. 8). PI(3,4,5)P<sub>3</sub> plays an important role in tumorigenesis and cancer metastasis. However, PIPKI $\gamma$  knockdown does not affect the activation of Akt, a major target of PI(3,4,5)P<sub>3</sub>, in HCT116 cells (data not shown), probably because Akt can be activated by PI(3,4)P<sub>2</sub>, which is not directly affected by PIPKI $\gamma$ .

Inhibition of PI 3-kinase using LY294002 does not influence focal adhesion formation in HCT116 cells, suggesting that PI(4,5)P<sub>2</sub> instead of PI(3,4,5)P<sub>3</sub> is responsible for PIPKI $\gamma$ -mediated focal adhesion formation. PI(4,5)P<sub>2</sub> promotes vinculin binding to talin and actin and has been shown to be essential for focal adhesion formation [32]. Our result shows that PIPKI $\gamma$  regulates vinculin localizing to focal adhesions in HCT116 cells (Fig. 9). Taken together, it is most likely that PIPKI $\gamma$  regulates focal adhesion formation through PI(4,5)P<sub>2</sub>-mediated vinculin activation.

Cancer invasion is a complicated process, requiring spatial and temporary regulation of cell-matrix adhesions, cell protrusions and matrix-degradation [38]. PI(4,5)P<sub>2</sub> generated by PIPKI $\gamma$  regulates cancer invasion through modulating cell adhesion dynamics. Although PI(3,4,5)P<sub>3</sub> is not essential for focal adhesion formation, it may also play a role in other aspects of cancer invasion, probably through activating Rac [39].

## Materials and Methods

### Reagents

Anti-paxillin antibody (clone 5H11) was from Millipore; Anti-PIPKI $\gamma$  polyclonal antibody was from Cell Signaling Technology; Anti-tubulin antibody and pLKO1 lentivirus PIPKI $\gamma$  shRNA (sequence: CCG GGC AGT CCT ACA GGT TCA TCA ACT CGA GTT GAT GAA CCT GTA GGA CTG CTT TTT G) were from Sigma; DyLight 549 conjugated goat anti-mouse IgG (H+L) was from Thermo Scientific; Fibronectin and recombinant HGF were from Akron Biotech; Growth factor reduced Matrigel was from BD Bioscience; The plasmid pEGFP-PIPKI $\gamma$  was a gift from Dr. Mark Ginsberg (University of California-San Diego); Pfu Ultra was from Agilent Technologies; DNA primers were synthesized by Integrated DNA Technologies.

### Plasmid construction

The plasmid pEGFP-PIPKI $\gamma$ <sup>W647F</sup> was generated by pfu Ultra-based PCR using pEGFP-PIPKI $\gamma$  as template and 5'-GAT GAG AGG AGC TTT GTG TAC TCC CCG CTC-3'/5'-GAG CGG GGA GTA CAC AAA GCT CCT CTC ATC-3' as primers. pEGFP-PIPKI $\gamma$ <sup>K188,200R</sup> and pZZ-PIPKI $\gamma$ <sup>K188,200R</sup> were created by PCR using pEGFP-PIPKI $\gamma$  and pZZ-PIPKI $\gamma$  [40] as templates, respectively, and sequentially 5'-GAC GAG TTC ATC ATC AGG ACC GTC ATG CAC-3'/5'-GTG CAT GAC GGT CCT GAT GAT GAA CTC GTC-3' and 5'-GTT CCT GCA GAG GCT GCT CCC TGG CTA C-3'/5'-GTA GCC AGG GAG CAG CCT CTG CAG GAA C-3' as primers. pEGFP-PIPKI $\gamma$ <sup>D316K</sup> was constructed by using pEGFP-PIPKI $\gamma$  as template and 5'-AGT TTC AAG ATC ATG AAG TAC AGC CTG CTG CTG GGC-3'/5'-GCC CAG CAG CAG GCT GTA CTT CAT GAT CTT GAA ACT-3' as primers. pBabe-EGFP-PIPKI $\gamma$  and -EGFP-PIPKI $\gamma$ <sup>K188,200R</sup> were generated by sequentially digesting pEGFP-PIPKI $\gamma$  and pEGFP-PIPKI $\gamma$ <sup>K188,200R</sup> with AgeI, treating with Klenow and digesting with SalI. The resulting smaller fragments were subcloned into pBabe-puro vector that had been pre-treated with EcoRI, Klenow and SalI. pBabe-ZZ-PIPKI $\gamma$  was made by sequentially digesting pZZ-



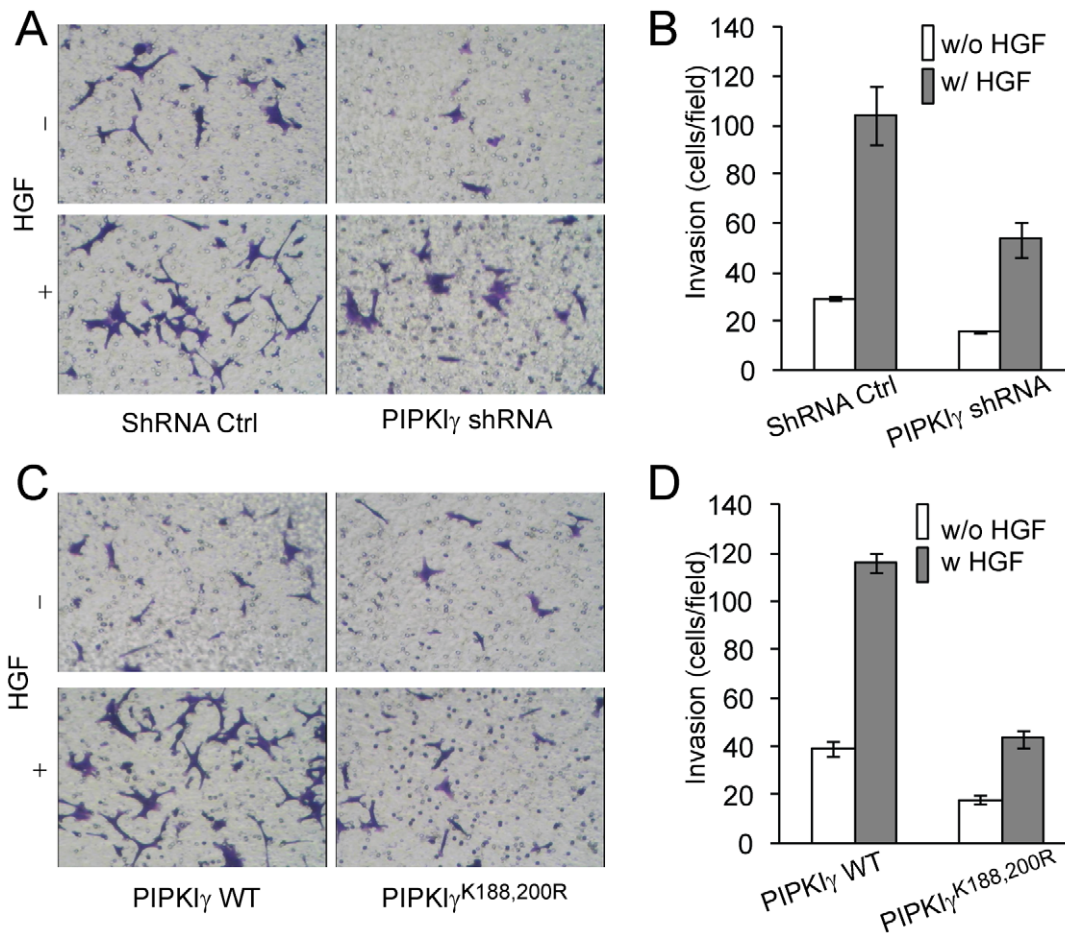

**Figure 7. Either depletion of PIPK1 $\gamma$  or expression of PIPK1 $\gamma$ <sup>K188,200R</sup> inhibited the invasion of HCT116 cells.** (A) Depletion of PIPK1 $\gamma$  by using shRNA inhibited the invasion of HCT116 cells. The invasive capacities of cells stably expressing shRNA control or PIPK1 $\gamma$  shRNA were examined in the absence and presence of HGF (50 ng/ml) by Matrigel-based invasion assays. (B) Quantification of the invasion of HCT116 cells that stably express shRNA control or PIPK1 $\gamma$  shRNA. n = 5, error bar = mean  $\pm$  s.e.m; ctrl vs PIPK1 $\gamma$ , p < 0.01; ctrl HGF vs PIPK1 $\gamma$  HGF, p < 0.01. (C) Expression of PIPK1 $\gamma$ <sup>K188,200R</sup> inhibited the invasion of HCT116 cells. The cells that stably express EGFP-PIPK1 $\gamma$  or -PIPK1 $\gamma$ <sup>K188,200R</sup> were tested for invasive capacities in the absence and presence of HGF. (D) Quantification of the invasion of HCT116 cells that stably express EGFP-PIPK1 $\gamma$  or -PIPK1 $\gamma$ <sup>K188,200R</sup>. n = 3, error bar = mean  $\pm$  s.e.m; WT vs K188,200R, P < 0.01; WT HGF vs K188,200R HGF, P < 0.005. doi:10.1371/journal.pone.0024775.g007

PIPK1 $\gamma$  with AgeI, blunting with Klenow, and digesting with SalI. The smaller fragments were sub-cloned into pBabe-neo vector that had been treated with BamHI, Klenow, and SalI. pBabe-ZZ-PIPK1 $\gamma$ <sup>Rescue</sup> were created by PCR using pBabe-ZZ-PIPK1 $\gamma$  as template and sequentially 5'-GGC ATC ATC GAC ATC CTG CAA TCG TAC AGG TTC -3'/5'-GAA CCT GTA CGA TTG CAG GAT GTC GAT GAT GCC -3' and 5'- TCG TAC AGG TTG ATA AAG AAA CTG GAG CAC ACC TG-3'/5'- CAG GTG TGC TCC AGT TTC TTT ATC AAC CTG TAC GA-3' as primers. All plasmids were sequenced by Eurofins MWG Operon (Huntsville, AL).

**Cell culture, transfections and infections**

CHO-K1 Chinese hamster ovary cells, HCT116 human colon cancer cells and 293T human embryonic kidney cells were from the American Type Culture Collection and were maintained in DMEM medium (Mediatech, Inc.) containing 10% fetal bovine serum (FBS), penicillin (100 U ml<sup>-1</sup>) and streptomycin (100  $\mu$ g ml<sup>-1</sup>). CHO-K1 cells were transfected with Safectine RU50 (Syd Labs) according to the manufacturer's protocol. HCT116 cells that stably express EGFP-PIPK1 $\gamma$  WT, or -PIPK1 $\gamma$ <sup>K188, 200R</sup>, were

obtained by transfecting the cells with TurboFect (Fermentas) and sorting EGFP-positive cells after G418 selection in the University of Kentucky Flow Cytometry Facility, or by infecting with pBabe retrovirus and selecting with puromycin. HCT116 cells stably expressing shRNA control or PIPK1 $\gamma$  shRNA were obtained by infecting with pLKO1 lentivirus and selected with puromycin.

**Preparation of viruses and cell infection**

The 293T cells were transfected with pBabe retrovirus or pLKO1 lentivirus system using Safectine RU50 transfection reagent according to the manufacturer's protocol. The medium of transfectants was collected at 48 and 72 h, filtered through 0.45- $\mu$ m filter and concentrated by ultracentrifugation. The virus particles were applied to overnight cultures of HCT116 cells for infection. Cells stably expressing recombinant proteins were obtained by growing infected cells in the presence of 1 mg/ml puromycin for 10 days.

**Immunofluorescence staining and TIRF imaging**

Cells were plated on glass coverslips that were precoated with 5  $\mu$ g/ml fibronectin. For immunofluorescence staining, the cells were fixed with 4% paraformaldehyde permeabilized with 0.5% Triton X-100,

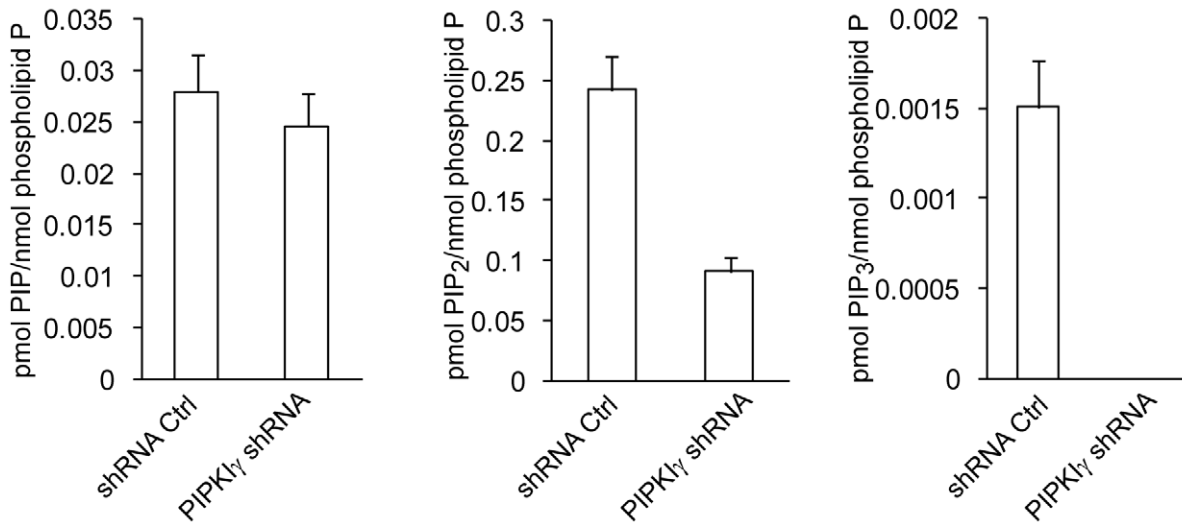

**Figure 8. PIP $\text{K}\gamma$  is a major enzyme responsible for PIP<sub>2</sub> and PIP<sub>3</sub> production in HCT116 cells.** Polyphosphoinositides from cells stably expressing shRNA control or PIP $\text{K}\gamma$  shRNA were extracted and derivatized using trimethylsilyl diazomethane, and then were measured using mass spectrometry. N=4, error bar=mean  $\pm$  s.e.m; PIP, P>0.05; PIP<sub>2</sub>, P=0.0034; PIP<sub>3</sub>, P=0.001. doi:10.1371/journal.pone.0024775.g008

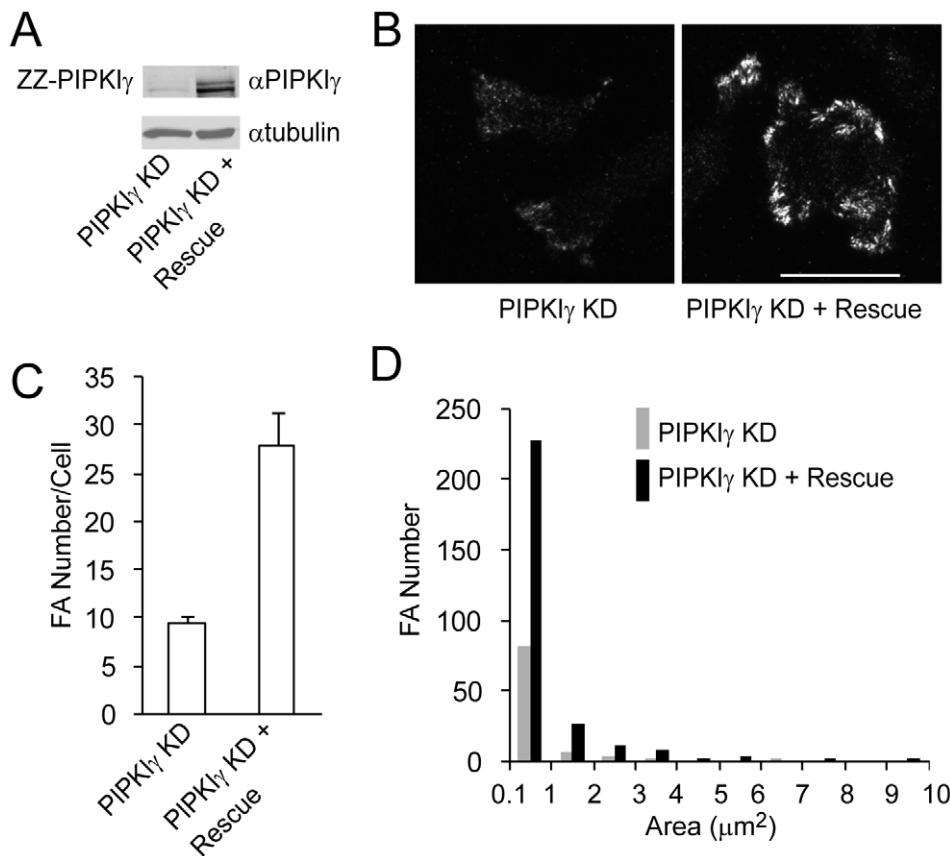

**Figure 9. PIP $\text{K}\gamma$  is required for vinculin localizing to focal adhesions in HCT116 cells.** (A) Re-expression of rescue ZZ-tagged PIP $\text{K}\gamma$  in cells that PIP $\text{K}\gamma$  has been knocked down (KD) by stably expressing PIP $\text{K}\gamma$  shRNA. The PIP $\text{K}\gamma$ -KD cells were infected with retroviral particles carrying rescue ZZ-tagged PIP $\text{K}\gamma$  selected with neomycin. ZZ-PIP $\text{K}\gamma$  was detected by Western blotting with an anti-PIP $\text{K}\gamma$  polyclonal antibody. (B) TIRF images of PIP $\text{K}\gamma$ -KD cells and the KD cells that express rescue PIP $\text{K}\gamma$ . Cells were plated on glass-bottomed dishes pre-coated with fibronectin (5  $\mu\text{g}/\text{ml}$ ), fixed and stained for vinculin. Scale bar, 20  $\mu\text{m}$ . (C) PIP $\text{K}\gamma$  rescue restored focal adhesion formation in PIP $\text{K}\gamma$ -KD cells. (n=11, error bar=mean  $\pm$  s.e.m; paired t-test, P<0.0001) (D) Area distribution of focal adhesions in PIP $\text{K}\gamma$ -KD cells and the KD cells expressing rescue PIP $\text{K}\gamma$ . doi:10.1371/journal.pone.0024775.g009

blocked with 5% BSA in PBS, and then incubated with anti-paxillin mAb. Paxillin was then visualized by incubating with DyLight 549 Conjugated goat Anti-mouse IgG (H+L). Paxillin staining and EGFP fluorescence were viewed by using a Nikon Eclipse Ti TIRF microscope equipped with a 60 $\times$ , 1.45 NA objective, CoolSNAP HQ2 CCD camera (Roper Scientific). Images were acquired and analyzed by using NIS-Elements (Nikon). To quantify the number and area of focal adhesions, paxillin immunofluorescence images were thresholded to include only focal adhesions and the number and area were calculated by using the software.

### Time-lapse live fluorescence imaging

CHO-K1 cells that stably express EGFP-PIPKI $\gamma$  WT, or -PIPKI $\gamma$ <sup>K188,200R</sup> were transfected with mDsRed-paxillin. At 24 h post-transfection, the cells were trypsinized and plated on MatTek dishes (with a glass coverslip at the bottom) that had been precoated with fibronectin (5  $\mu$ g ml<sup>-1</sup>). The cells were cultured for 3 hours and TIRF images were taken using the Nikon Eclipse Ti TIRF microscope stated earlier and the temperature and humidity were maintained by using a INU-TIZ-F1 microscope incubation system (Tokai Hit). Images were recorded at 1-min intervals for a 120 min period. Focal adhesion assembly and disassembly rate constants were analyzed as described previously [22].

### PIPKI $\gamma$ activity assays

pZZ-PIPKI $\gamma$  and pZZ-PIPKI $\gamma$ <sup>K188,200R</sup> were transfected into CHO-K1 cells. At 24 h post-transfection, the cells were harvested in a lysis buffer (50 mM Tris-HCl, pH8.1, 140 mM NaCl, 50 mM NaF, 1% Triton X-100, 10 mM 2-mercaptoethanol, 0.5 mM AEBSF, 10  $\mu$ g/ml aprotinin, 10  $\mu$ g/ml leupeptin, 5  $\mu$ g/ml E-64, 5  $\mu$ g/ml pepstatin, 5  $\mu$ g/ml bebstatin). Cell lysates were cleared by centrifugation and pZZ-PIPKI $\gamma$  and pZZ-PIPKI $\gamma$ <sup>K188,200R</sup> in supernatants were immuno-precipitated using IgG-Agarose beads. The beads were washed three times with lysis buffer and washed once with a kinase buffer (50 mM Tris-HCl, pH7.5, 5 mM MgCl<sub>2</sub>, 25 mM KCl, 0.5 mM EGTA, and 0.5 mM ATP). The beads were incubated with 100  $\mu$ L of the kinase buffer containing 100  $\mu$ M PI(4)P for 30 min at 37°C. PI(4,5)P<sub>2</sub> formed in these assays was extracted using modified Bligh-Dyer extraction [41]. Phosphoinositides were quantitated using a Shimadzu UFLC coupled with an ABI 4000-Qtrap hybrid linear ion trap triple quadrupole mass spectrometer in multiple reaction monitoring (MRM) mode. 17:0–20:4 PI(4)P, 17:0–20:4 PI(4,5)P<sub>2</sub> and 17:0–20:4 PI(3,4,5)P<sub>3</sub> (Avanti Polar Lipids) were used as internal standards. PIP, PIP2 and PIP3s were analyzed on an XTerra C8, 3.5  $\mu$ , 3.0 $\times$ 100 mm column. Detailed experimental procedures are described in Materials S1.

### Quantitation of Polyphosphoinositides in cells

Polyphosphoinositides were extracted using a modified Bligh-Dyer extraction [41] and were derivatized using trimethylsilyl diazomethane as described [42]. Polyphosphoinositides were measured as their TMS-diazomethane derivatives using a Shimadzu UFLC equipped with a Vydac 214MS C4, 5  $\mu$ , 4.6 $\times$ 250 mm column, coupled with an ABI 4000-Qtrap hybrid linear ion trap triple quadrupole mass spectrometer in multiple reaction monitoring (MRM) mode. 17:0–20:4 PI(4)P, 17:0–20:4 PI(4,5)P<sub>2</sub> and 17:0–20:4 PI(3,4,5)P<sub>3</sub> were used as internal standards. Detailed experimental procedures are described in Materials S1.

### Centrifugation assays

HCT116 cells growing on 60-mm dishes were incubated in 2 ml of 2  $\mu$ g/ml calcein-AM in opti-MEM for 20 min at 37°C. The cells were then trypsinized, washed and re-suspended in normal

growth media containing 10%FBS. The cell suspensions (100  $\mu$ l, 40,000 cells/well) were added to a 96-well plate coated with different concentrations of fibronectin, centrifuged at 180g in a Beckman Coulter Allegra X-15R centrifuge (SX4750A rotor) and allowed to attach for 1h in 37°C CO2 incubator. Each well was then carefully aspirated to remove floating cells and refilled with fresh PBS-dextrose. An initial fluorescence (F<sub>0</sub>) was read to determine the density of cells before detachment using a Promega Glomax multi+ Detection system (490 nm excitation, 510–570 nm emission). The lid was then removed, and the plate was covered with sealing tape and centrifuged upside down at 150 g for 5 min to detach the cells. The wells were carefully aspirated and refilled with fresh PBS-dextrose. The fluorescence after centrifuging (F<sub>a</sub>) was read to determine the density of cells that remain attached.

### Invasion Assays

One hundred microliters of Matrigel (1:30 dilution in serum-free DMEM medium) was added to each Transwell polycarbonate filter (6 mm diameter, 8  $\mu$ m pore size, Costar) and incubated with the filters at 37°C for 4 h. HCT116 cells were trypsinized and washed 3 times with DMEM containing 1% FBS. The cells were resuspended in DMEM containing 1% FBS at a density of 1 $\times$ 10<sup>6</sup> cells/ml. The cell suspensions (100  $\mu$ l) were seeded into the upper chambers, and 600  $\mu$ l of DMEM medium containing 1% FBS and 5  $\mu$ g/ml Fibronectin with or without 50 ng/ml HGF were added to the lower chambers. The cells were allowed to invade for 36 h in a CO2 incubator. The invaded cells were fixed for 15 min with 3.7% formaldehyde and stained using 0.1% crystal violet in 10% ethanol for 30 min. The number of invaded cells per field was counted under a light microscope at  $\times$ 200.

### Supporting Information

**Figure S1 PIPKI $\gamma$ <sup>D316K</sup>, a kinase-dead mutant, was unable to promote focal adhesion formation in CHO-K1 cells.** (A) TIRF images of CHO-K1 cells expressing PIPKI $\gamma$  or PIPKI $\gamma$ <sup>D316K</sup>. Cells were transiently transfected with pEGFP-PIPKI $\gamma$  WT or -PIPKI $\gamma$ <sup>D316K</sup>, and then stained for paxillin. Scale bar, 20  $\mu$ m. (B) PIPKI $\gamma$ <sup>D316K</sup> was deficient in promoting an increase in focal adhesion number (n = 10, error bar = mean  $\pm$  s.e.m; P<0.005). (C) Area distribution of focal adhesions in cells expressing PIPKI $\gamma$  and PIPKI $\gamma$ <sup>D316K</sup>. (TIF)

**Figure S2 Neither expression of PIPKI $\gamma$ <sup>K188,200R</sup> nor depletion of PIPKI $\gamma$  impaired the migration of HCT116 cells.** (A) Expression of PIPKI $\gamma$ <sup>K188,200R</sup> slightly enhanced the migration of HCT116 cells. The cells that stably express EGFP-PIPKI $\gamma$  or -PIPKI $\gamma$ <sup>K188,200R</sup> were plated on 35 mm MatTek glass bottom dishes coated with 5  $\mu$ g/ml fibronectin, and grown to 90% confluency. The medium was then changed to DMEM containing 1%FBS and 10 ng/ml HGF for 6 h. A wound was made on the confluent monolayer, and time-lapse cell migration was recorded using a Nikon Biostation IMQ. The pictures were extracted from time-lapse movies. (B) Quantification of the migration speed of HCT116 cells that stably express PIPKI $\gamma$  or PIPKI $\gamma$ <sup>K188,200R</sup> using NIS-Elements AR 3.2. (n = 4, \*P<0.05). (C) Depletion of PIPKI $\gamma$  by using shRNA had no significant effect on the migration of HCT116 cells. The migration of cells stably expressing shRNA control or PIPKI $\gamma$  shRNA were examined in the absence and presence of HGF (50 ng/ml) by Transwell migration assays. In brief, transwell polycarbonate filters (6 mm diameter, 8  $\mu$ m pore size, Costar) were coated with fibronectin (5  $\mu$ g/ml) over night. HCT116 cells were trypsinized and washed 3 times with DMEM containing 1% FBS. The cells were resuspended in DMEM

containing 1% FBS at a density of  $1 \times 10^6$  cells/ml. The cell suspensions (100  $\mu$ l) were seeded into the upper chambers, and 600  $\mu$ l of DMEM medium containing 1% FBS and 5  $\mu$ g/ml Fibronectin with or without 50 ng/ml HGF were added to the lower chambers. The cells were allowed to migrate for 24 h in a CO<sub>2</sub> incubator. The migrated cells were fixed for 15 min with 3.7% formaldehyde and stained using 0.1% crystal violet in 10% ethanol for 30 min. The number of migrated cells per membrane was counted under a light microscope at  $\times 200$ . (D) Quantification of the migration of HCT116 cells that stably express shRNA control or PIPK1 $\gamma$  shRNA.  $n = 3$ , error bar = mean  $\pm$  s.e.m,  $P > 0.05$ . (TIF)

## References

- Dubash AD, Menold MM, Samson T, Boulter E, Garcia-Mata R, et al. (2009) Chapter 1 Focal Adhesions: New Angles on an Old Structure. In: Kwang WJ, ed. *International Review of Cell and Molecular Biology*: Academic Press. pp 1–65.
- Romer LH, Birukov KG, Garcia JGN (2006) Focal Adhesions: Paradigm for a Signaling Nexus. *Circ Res* 98: 606–616.
- Webb DJ, Parsons JT, Horwitz AF (2002) Adhesion assembly, disassembly and turnover in migrating cells [mdash] over and over and over again. *Nat Cell Biol* 4: E97–E100.
- Li S, Guan J-L, Chien S (2005) BIOCHEMISTRY AND BIOMECHANICS OF CELL MOTILITY. *Annu Rev Biomed Eng* 7: 105–150.
- Friedl P, Wolf K (2009) Proteolytic interstitial cell migration: a five-step process. *Cancer and Metastasis Rev* 28: 129–135.
- Le PU, Angers-Loustau A, de Oliveira RMW, Ajlan A, Brassard CL, et al. (2010) DRR drives brain cancer invasion by regulating cytoskeletal-focal adhesion dynamics. *Oncogene* 29: 4636–4647.
- Xu Y, Bismar TA, Su J, Xu B, Kristiansen G, et al. (2010) Filamin A regulates focal adhesion disassembly and suppresses breast cancer cell migration and invasion. *J Exp Med* 207: 2421–2437.
- Joshi B, Strugnell SS, Goetz JG, Kojic LD, Cox ME, et al. (2008) Phosphorylated Caveolin-1 Regulates Rho/ROCK-Dependent Focal Adhesion Dynamics and Tumor Cell Migration and Invasion. *Cancer Res* 68: 8210–8220.
- Webb DJ, Donais K, Whitmore LA, Thomas SM, Turner CE, et al. (2004) FAK-Src signalling through paxillin, ERK and MLCK regulates adhesion disassembly. *Nat Cell Biol* 6: 154–161.
- Schlaepfer DD, Mitra SK (2004) Multiple connections link FAK to cell motility and invasion. *Curr Opin Genet Dev* 14: 92–101.
- Hsia DA, Mitra SK, Hauck CR, Strelow DN, Nelson JA, et al. (2003) Differential regulation of cell motility and invasion by FAK. *J Cell Biol* 160: 753–767.
- Schober M, Raghavan S, Nikolova M, Polak L, Pasolli HA, et al. (2007) Focal adhesion kinase modulates tension signaling to control actin and focal adhesion dynamics. *J Cell Biol* 176: 667–680.
- Ezratty EJ, Partridge MA, Gundersen GG (2005) Microtubule-induced focal adhesion disassembly is mediated by dynamin and focal adhesion kinase. *Nat Cell Biol* 7: 581–590.
- Huang C, Rajfur Z, Borchers C, Schaller MD, Jacobson K (2003) JNK phosphorylates paxillin and regulates cell migration. *Nature* 424: 219–223.
- Nayal A, Webb DJ, Brown CM, Schaefer EM, Vicente-Manzanares M, et al. (2006) Paxillin phosphorylation at Ser273 localizes a GIT1–PIX–PAK complex and regulates adhesion and protrusion dynamics. *J Cell Biol* 173: 587–589.
- Nayal A, Webb DJ, Horwitz AF (2004) Talin: an emerging focal point of adhesion dynamics. *Curr Opin Cell Biol* 16: 94–98.
- Priddle H, Hemmings L, Monkley S, Woods A, Patel B, et al. (1998) Disruption of the talin gene compromises focal adhesion assembly in undifferentiated but not differentiated embryonic stem cells. *J Cell Biol* 142: 1121–1133.
- Calderwood DA, Ginsberg MH (2003) Talin forges the links between integrins and actin. *Nat Cell Biol* 5: 694–697.
- Franco SJ, Rodgers MA, Perrin BJ, Han JW, Bennis DA, et al. (2004) Calpain-mediated proteolysis of talin regulates adhesion dynamics. *Nat Cell Biol* 6: 977–983.
- Corteso CL, Boateng LR, Piazza TM, Bennis DA, Huttenlocher A (2011) Calpain-mediated Proteolysis of Paxillin Negatively Regulates Focal Adhesion Dynamics and Cell Migration. *J Biol Chem* 286: 9998–10006.
- Chan KT, Bennis DA, Huttenlocher A (2010) Regulation of Adhesion Dynamics by Calpain-mediated Proteolysis of Focal Adhesion Kinase (FAK). *J Biol Chem* 285: 11418–11426.
- Huang C, Rajfur Z, Yousefi N, Chen ZZ, Jacobson K, et al. (2009) Talin phosphorylation by Cdk5 regulates Smurf1-mediated talin head ubiquitylation and cell migration. *Nat Cell Biol* 11: 624–U404.
- Wu X, Kodama A, Fuchs E (2008) ACF7 Regulates Cytoskeletal-Focal Adhesion Dynamics and Migration and Has ATPase Activity. *Cell* 135: 137–148.
- van den Bout I, Divecha N (2009) PIP5K-driven PtdIns(4,5)P<sub>2</sub> synthesis: regulation and cellular functions. *J Cell Sci* 122: 3837–3850.
- Ishihara H, Shibasaki Y, Kizuki N, Wada T, Yazaki Y, et al. (1998) Type I Phosphatidylinositol-4-phosphate 5-Kinases. *J Biol Chem* 273: 8741–8748.
- Di Paolo G, Pellegrini L, Letinic K, Cestra G, Zoncu R, et al. (2002) Recruitment and regulation of phosphatidylinositol phosphate kinase type 1 gamma by the FERM domain of talin. *Nature* 420: 85–89.
- Ling K, Doughman RL, Firestone AJ, Bunce MW, Anderson RA (2002) Type I[gamma] phosphatidylinositol phosphate kinase targets and regulates focal adhesions. *Nature* 420: 89–93.
- Ling K, Baird SF, Carbonara C, Turbin DA, Huntsman DG, et al. (2007) Type I $\gamma$  phosphatidylinositol phosphate kinase modulates adherens junction and E-cadherin trafficking via a direct interaction with  $\mu$ 1B adaptin. *J Cell Biol* 176: 343–353.
- El Sayegh TY, Arora PD, Ling K, Laschinger C, Janmey PA, et al. (2007) Phosphatidylinositol-4,5 Bisphosphate Produced by PIP5K{gamma} Regulates Gelsolin, Actin Assembly, and Adhesion Strength of N-Cadherin Junctions. *Mol Biol Cell* 18: 3026–3038.
- Sun Y, Ling K, Wagoner MP, Anderson RA (2007) Type I $\gamma$  phosphatidylinositol phosphate kinase is required for EGF-stimulated directional cell migration. *J Cell Biol* 178: 297–308.
- Saltel F, Mortier E, Hytönen VP, Jacquier M-C, Zimmermann P, et al. (2009) New PI(4,5)P<sub>2</sub>- and membrane proximal integrin-binding motifs in the talin head control  $\beta$ 3-integrin clustering. *J Cell Biol* 187: 715–731.
- Gilmore AP, Burridge K (1996) Regulation of vinculin binding to talin and actin by phosphatidylinositol-4,5-bisphosphate. *Nature* 381: 531–535.
- Giudici M-L, Emson PC, Irvine RF (2004) A novel neuronal-specific splice variant of Type I phosphatidylinositol 4-phosphate 5-kinase isoform gamma. *Biochem J* 379: 489–496.
- Ling K, Schill NJ, Wagoner MP, Sun Y, Anderson RA (2006) Movin' on up: the role of PtdIns(4,5)P<sub>2</sub> in cell migration. *Trends in Cell Biol* 16: 276–284.
- Martel V, Racaud-Sultan C, Dupe S, Marie C, Paulhe F, et al. (2001) Conformation, Localization, and Integrin Binding of Talin Depend on Its Interaction with Phosphoinositides. *J Biol Chem* 276: 21217–21227.
- Tall EG, Spector I, Pentylala SN, Bitter I, Rebecchi MJ (2000) Dynamics of phosphatidylinositol 4,5-bisphosphate in actin-rich structures. *Curr Biol* 10: 743–746.
- Sun Y, Turbin D, Ling K, Thapa N, Leung S, et al. (2010) Type I gamma phosphatidylinositol phosphate kinase modulates invasion and proliferation and its expression correlates with poor prognosis in breast cancer. *Breast Cancer Res* 12: R6.
- Comoglio PM, Trusolino L (2002) Invasive growth: from development to metastasis. *J Clin Invest* 109: 857–862.
- Qin J, Xie Y, Wang B, Hoshino M, Wolff DW, et al. (2009) Upregulation of PIP3-dependent Rac exchanger 1 (P-Rex1) promotes prostate cancer metastasis. *Oncogene* 28: 1853–1863.
- Huang C, Jacobson K (2010) Detection of protein-protein interactions using nonimmune IgG and BirA-mediated biotinylation. *Biotechniques* 49: 881–886.
- Honeyman TW, Strohsmitter W, Scheid C R, Schimmel R J (1983) Phosphatidic acid and phosphatidylinositol labelling in adipose tissue. Relationship to the metabolic effects of insulin and insulin-like agents. *Biochem J* 212: 489–498.
- Clark J, Anderson KE, Juvin V, Smith TS, Karpe F, et al. (2011) Quantification of PtdInsP<sub>3</sub> molecular species in cells and tissues by mass spectrometry. *Nat Meth* 8: 267–272.
